# Supplementary material for: Oxygen-vacancy-mediated photocatalytic degradation of tetracycline under weak visible-light irradiation over hierarchical Bi2MoO6@Bi2O3 core–shell fibers
Source: Royal Society of Chemistry journal article supplement (doi:10.1039/d1cy02285g), 2022-01-01
Supplement: d1cy02285g1.pdf [file d1cy02285g1.pdf]

## Supplementary Material

### Oxygen-vacancy-mediated photocatalytic degradation of tetracycline under weak visible-light irradiation over hierarchical Bi<sub>2</sub>MoO<sub>6</sub>@Bi<sub>2</sub>O<sub>3</sub> core-shell fibers

Liruhua Zhang,<sup>a</sup> Qianhong Shen,<sup>\*a,b,c</sup> Renyuan Zhan,<sup>a</sup> Suhua Zheng,<sup>a</sup> Jiansong Sheng,<sup>b</sup> Hui Yang<sup>\*a,</sup>

<sup>b,c</sup>

a. State Key Laboratory of Silicon Materials, School of Materials Science and Engineering, Zhejiang University, Hangzhou P.R. China 310027

b. Zhejiang-California International NanoSystems Institute, Zhejiang University, Hangzhou P.R. China 310058

c. ZJU-Hangzhou Global Scientific and Technological Innovation Center, Hangzhou P.R. China 311215

#### Table S1

The intermediates of TC in photocatalytic degradation system over BBM-2 heterojunction.

| No. | Formula                                                       | m/z | Supposed structure |
|-----|---------------------------------------------------------------|-----|--------------------|
| 1   | C <sub>22</sub> H <sub>24</sub> N <sub>2</sub> O <sub>8</sub> | 445 |                    |
| 2   | C <sub>22</sub> H <sub>22</sub> N <sub>2</sub> O <sub>8</sub> | 443 |                    |
| 3   | C <sub>21</sub> H <sub>20</sub> N <sub>2</sub> O <sub>7</sub> | 413 |                    |

|    |                      |     |                                                                                      |
|----|----------------------|-----|--------------------------------------------------------------------------------------|
| 4  | $C_{20}H_{18}N_2O_7$ | 399 | 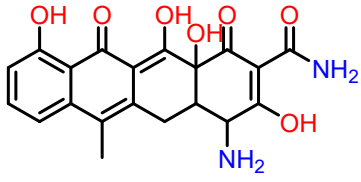   |
| 5  | $C_{22}H_{22}N_2O_7$ | 427 |    |
| 6  | $C_{22}H_{19}NO_7$   | 410 |    |
| 7  | $C_{22}H_{17}NO_6$   | 392 |   |
| 8  | $C_{22}H_{20}N_2O_6$ | 409 |  |
| 9  | $C_{21}H_{26}N_2O_7$ | 419 |  |
| 10 | $C_{21}H_{24}N_2O_7$ | 417 |  |
| 11 | $C_{19}H_{16}N_2O_5$ | 353 |  |

|    |                    |     |  |
|----|--------------------|-----|--|
| 12 | $C_{18}H_{19}NO_6$ | 346 |  |
| 13 | $C_{15}H_{12}O_6$  | 289 |  |
| 14 | $C_{12}H_{10}O_6$  | 251 |  |
| 15 | $C_{11}H_8O_5$     | 221 |  |

16

17
